# Supplementary material for: Selective recognition of human telomeric G-quadruplex with designed peptide via hydrogen bonding followed by base stacking interactions
Source: Royal Society of Chemistry journal article supplement (doi:10.1039/c9ra08761c), 2019-01-01
Supplement: c9ra08761c1.pdf [file c9ra08761c1.pdf]

## Selective Recognition of Human Telomeric G-quadruplex with Designed Peptide via Hydrogen Bonding Followed by Base Stacking Interactions

Shikhar Tyagi<sup>a</sup>, Sarika Saxena<sup>a\*</sup>, Nikita Kundu<sup>a</sup>, Taniya Sharma<sup>a</sup>, Amlan Chakraborty<sup>b</sup>,  
Sarvpreet Kaur<sup>a</sup>, Daisuke Miyoshi<sup>c</sup>, Jadala. Shankaraswamy<sup>d</sup>

<sup>1</sup>Amity Institute of Biotechnology, Amity University Uttar Pradesh, Noida 201313, India.

<sup>2</sup>Department of Chemical Engineering, Monash University, Clayton, VIC 3800, Australia.

<sup>3</sup>Faculty of Frontiers of Innovative Research in Science and Technology (FIRST), Konan University, 7-1-20  
Minatojima-minamimachi, Chuo-ku, Kobe, Hyogo 650-0047, Japan

<sup>4</sup>Department of Fruit Science, College of Horticulture, Mojerla, Sri Konda Laxman Telangana State  
Horticultural University, 509382, Telangana, India.

Note: Shikhar Tyagi<sup>1</sup>, Nikita Kundu<sup>1</sup> and Taniya Sharma<sup>1</sup> share equal contribution.

Address of Correspondence: Structural Biology Lab, Sector-125, Expressway Highway, Amity Institute of  
Biotechnology, Amity University Uttar Pradesh, Noida 201313, India. Phone Number: 0120-4735600,  
Email: ssaxena1@amity.edu;sarikaigib@yahoo.co.in.

Page 1: Contents

Page 2: Figure S1 for the Normalized UV melting curve of HTPu.HTPy duplex with and  
without peptide in K<sup>+</sup>.

Page 2: Figure S2 for the Normalized UV melting curve of HTPy with and without peptide in  
K<sup>+</sup>.

Page 3: Figure S3 for the emission spectra of QW10 with increasing concentration of HTPu.

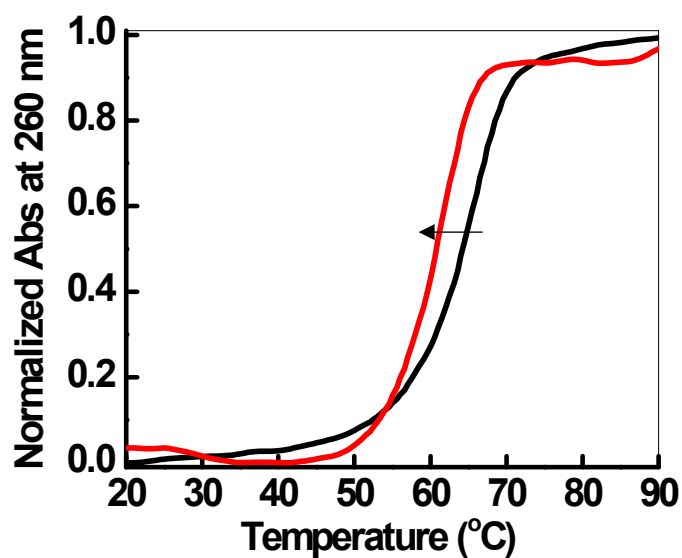

**Figure S1** Normalized UV melting curves of  $4\mu\text{M}$  HTPu in buffer containing 100 mM KCl, 0.5 mM EDTA, without any additive (black line); HTPu:HTPy: QW10 ratio (1:10) (red line).

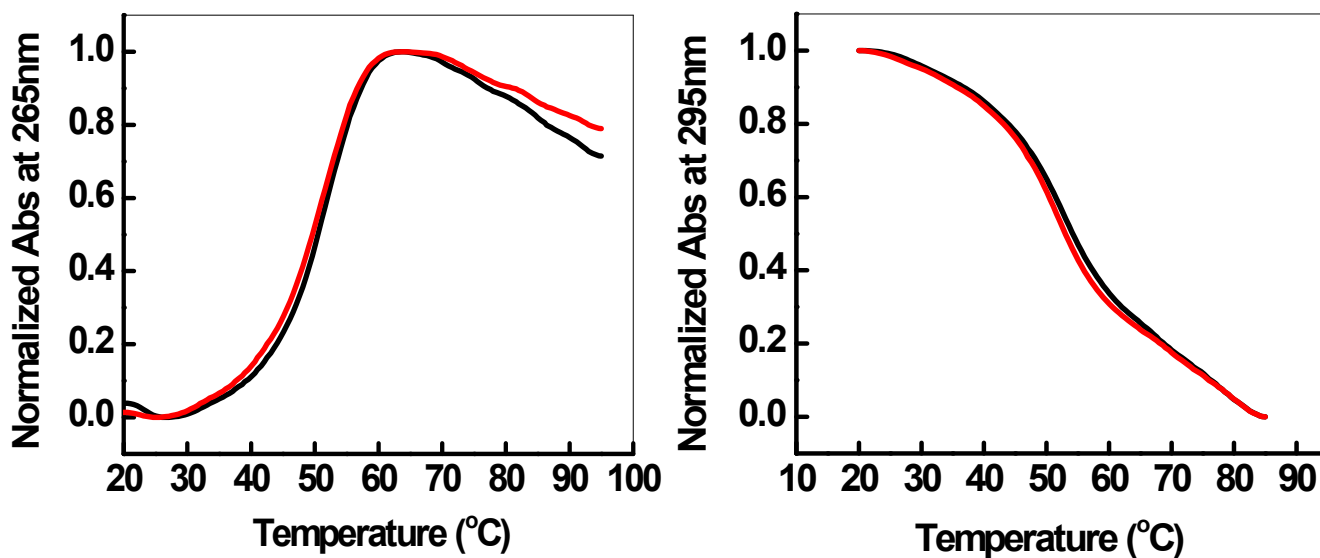

**Figure S2** Normalized UV melting curves of  $4\mu\text{M}$  HTPy in buffer containing 100 mM KCl, 0.5 mM EDTA, without any additive (black line); HTPu:HTPy: QW10 ratio (1:10) (red line) at 265 nm (a) and at 295 nm (b).

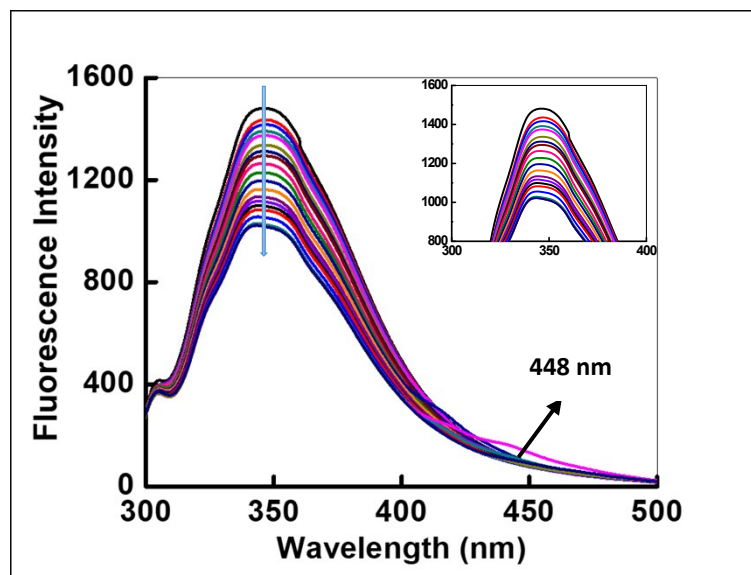

**Figure S3a** Emission Spectra of QW10 peptide with HTPu in buffer (pH 7.0) containing 100 mM KCl, 0.5 mM EDTA, at 25°C. QW10=4  $\mu$ M titrated with equimolar HTPu stock in an increasing concentration.

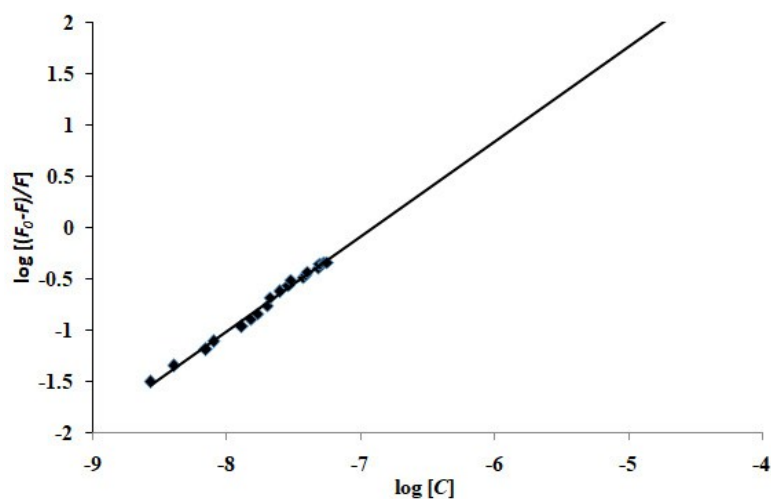

**Figure S3b:** Modified Stern Volmer plot. The experimental data fitting of double log relation to find binding parameters.
